# Supplementary material
Source: PubMed Central journal article supplement (PMC3369698)
Supplement: NIHMS378143-supplement-Suppl_Data.pdf [file NIHMS378143-supplement-Suppl_Data.pdf]

**Supplemental Table S1.** Detailed typing results obtained on a total of 81 *M. tuberculosis* clinical isolates from Cross River State, Nigeria.

[illegible]

\* SIT followed by an asterisk indicates "newly created shared-type" after match with another orphan in the database, or due to 2 or more strains belonging to a new pattern within this study

Spoligotype orphans highlighted in dark blue

\* MIT followed by an asterisk indicates "newly created shared-type" after match with another orphan in the database, or due to 2 or more strains belonging to a new pattern within this study

True MIRU12 orphans highlighted in sky blue
